# Supplementary material for: Activation of Mitochondrial 2-Oxoglutarate Dehydrogenase by Cocarboxylase in Human Lung Adenocarcinoma Cells A549 Is p53/p21-Dependent and Impairs Cellular Redox State, Mimicking the Cisplatin Action
Source: MDPI journal article supplement (doi:10.3390/ijms21113759), 2020-05-26
Supplement: s1 [file s1]

# Activation of Mitochondrial 2-Oxoglutarate Dehydrogenase by Cocarboxylase in Human Lung Adenocarcinoma Cells A549 is p53/p21-Dependent and Impairs Cellular Redox State, Mimicking the Cisplatin Action

Victoria I. Bunik, Vasily A. Aleshin, Xiaoshan Zhou, Vyacheslav Yu. Tabakov and Anna Karlsson

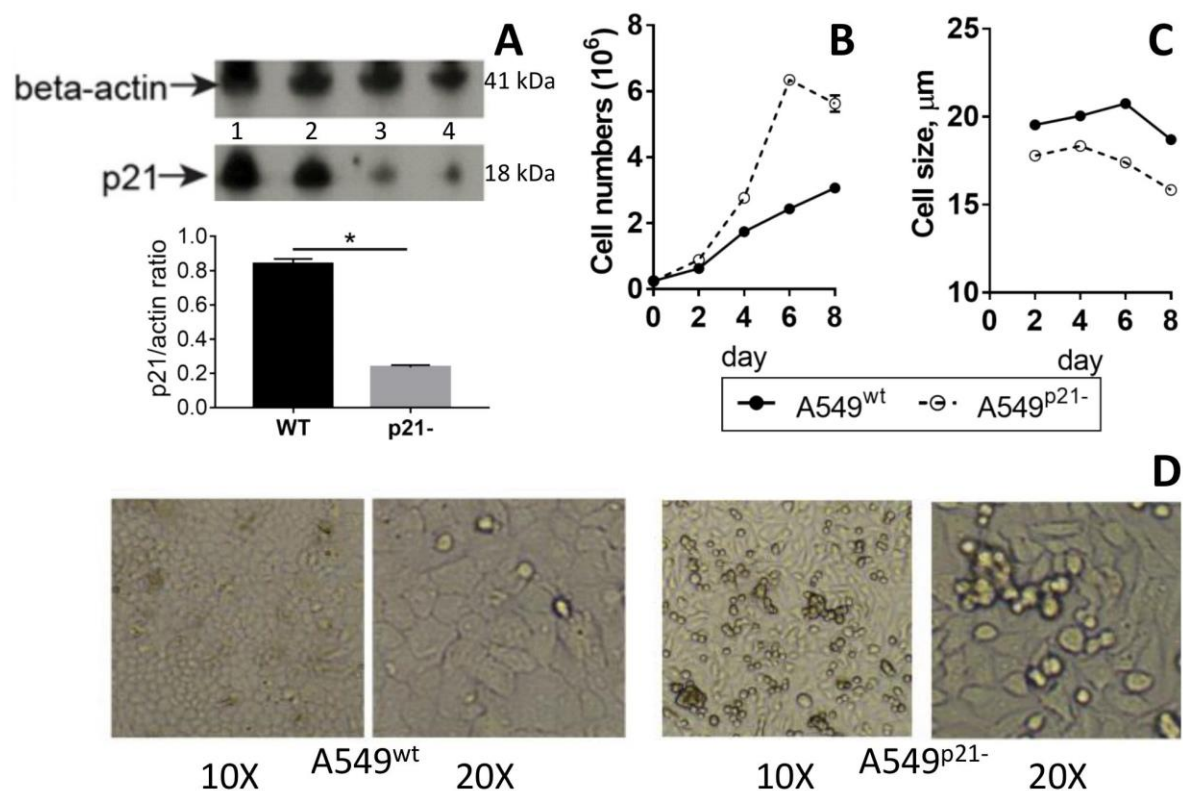

**Figure S1.** Comparison of A549<sup>p21-</sup> and A549<sup>wt</sup> cells. 25000 cells were seeded in 6-well plates and cultured in standard DMEM. **A.** The levels of p21 and beta-actin proteins, detected by Western blotting in A549<sup>p21-</sup> cells (lanes 3, 4), compared to A549<sup>wt</sup> cells (lanes 1, 2). Quantification was done using ImageJ2 (<https://imagej.net/ImageJ2>). The data are presented as mean ± SEM (\*,  $p < 0.05$  by unpaired  $t$  test with Welch's correction). **B.** Time-dependence of the cell number. **C.** Time-dependence of the cell diameter **D.** Images of the cell morphology at 10x and 20x zooming.

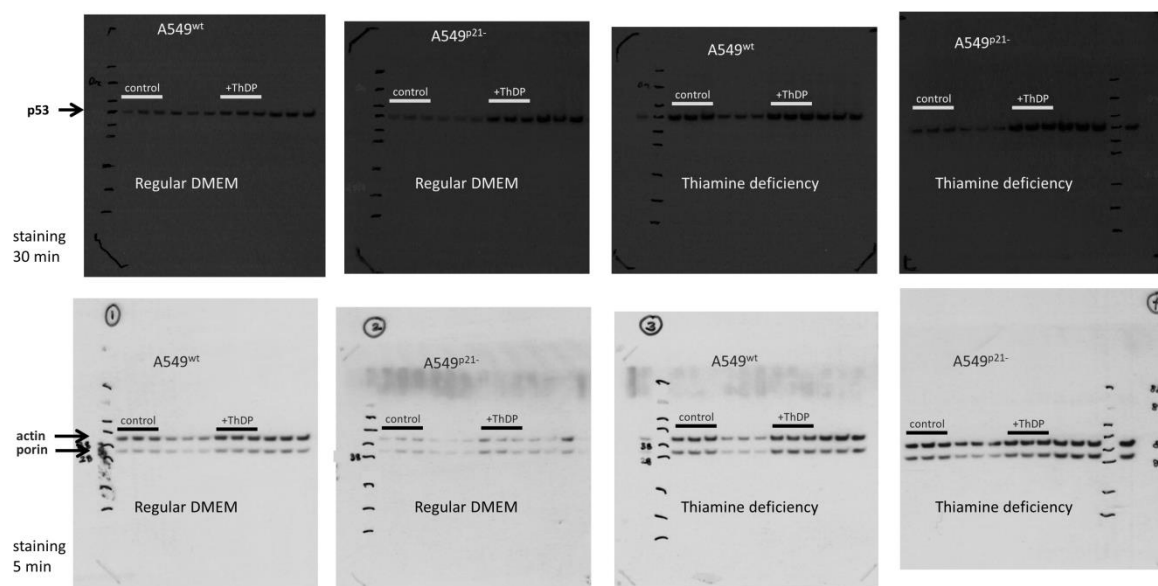

**Figure S2.** Uncropped western blots on the p53 levels (upper blots) and normalization to actin and VDAC/porin (bottom blots) under varied ThDP saturation in A549<sup>wt</sup> (1<sup>st</sup> and 3<sup>rd</sup> columns) and A549<sup>p21-</sup> (2<sup>nd</sup> and 4<sup>th</sup> columns) cells. Conditions of the cell cultures are as indicated on the blot pictures: the regular DMEM (1<sup>st</sup> and 2<sup>nd</sup> columns) or the thiamine deficient DMEM (3<sup>rd</sup> and 4<sup>th</sup> columns). +ThDP – addition of 5 mM ThDP.
